# Supplementary material
Source: MDPI journal article supplement (https://www.mdpi.com/2673-7655/2/1/3)
Supplement: s1 [file s1]

## Supplementary Materials

**Table S1.** Thermal time from sowing to harvest for rice grown in Year 1 and Year 2 (base temperature = 10 °C)

| Variety     | Heat Sums (°Cd) |        |            |
|-------------|-----------------|--------|------------|
|             | Year 1          | Year 2 | Difference |
| Doongara    | 2047            | 2421   | 373        |
| Koshihikari | 1779            | 1976   | 197        |
| Langi       | 1906            | 2170   | 264        |
| Reiziq      | 1783            | 1964   | 181        |
| Sherpa      | 1854            | 2100   | 246        |
| Tachiminori | 1910            | 2036   | 126        |
| TDK8        | 2384            | 2684   | 300        |
| YRW4        | 1770            | 1982   | 212        |
| Mean        | 1929            | 2167   | 237        |

**Table S2.** Dates of flowering and maturity harvests in Year 1 environments

| Growing Condition | Variety     | Planting   | 50% Flowering | Harvesting |
|-------------------|-------------|------------|---------------|------------|
| a. Well-watered   | Doongara    | 15/11/2017 | 16/02/2018    | 31/03/2018 |
|                   | Koshihikari | 15/11/2017 | 29/01/2018    | 13/03/2018 |
|                   | Langi       | 15/11/2017 | 5/02/2018     | 20/03/2018 |
|                   | Reiziq      | 15/11/2017 | 29/01/2018    | 13/03/2018 |
|                   | Sherpa      | 15/11/2017 | 3/02/2018     | 18/03/2018 |
|                   | Tachiminori | 15/11/2017 | 7/02/2018     | 22/03/2018 |
|                   | TDK8        | 15/11/2017 | 19/03/2018    | 2/05/2018  |
|                   | YRW4        | 15/11/2017 | 29/01/2018    | 13/03/2018 |
|                   |             |            |               |            |
| b. Water deficit  | Doongara    | 23/11/2017 | 28/02/2018    | 22/04/2018 |
|                   | Sherpa      | 23/11/2017 | 15/02/2018    | 30/03/2018 |
|                   | Tachiminori | 23/11/2017 | 13/02/2018    | 28/03/2018 |
|                   | TDK8        | 23/11/2017 | 28/03/2018    | 10/05/2018 |

**Table S3.** Dates of flowering and maturity harvests in Year 2 season

| Variety     | Planting  | 50% Flowering | Harvesting |
|-------------|-----------|---------------|------------|
| Doongara    | 1/11/2018 | 18/02/2019    | 30/03/2019 |
| Koshihikari | 1/11/2018 | 25/01/2019    | 6/03/2019  |
| Langi       | 1/11/2018 | 3/02/2019     | 15/03/2019 |
| Reiziq      | 1/11/2018 | 24/01/2019    | 5/03/2019  |
| Sherpa      | 1/11/2018 | 31/01/2019    | 12/03/2019 |
| Tachiminori | 1/11/2018 | 27/01/2019    | 8/03/2019  |
| TDK8        | 1/11/2018 | 19/03/2019    | 28/04/2019 |
| YRW4        | 1/11/2018 | 23/01/2019    | 4/03/2019  |

**Table S4.** Yield of green rice (GR) by days after flowering (DAF), percentage of GR in paddy at respective DAF and percentage of GR in mature paddy (Year 1)

| Variety           | GR Yield (t/ha) |        |        |        |         | Percentage GR in Paddy at Respective DAF (%) |        |        |        |         | Percentage GR in Mature paddy (%) |        |        |        |         |
|-------------------|-----------------|--------|--------|--------|---------|----------------------------------------------|--------|--------|--------|---------|-----------------------------------|--------|--------|--------|---------|
|                   | 15 DAF          | 20 DAF | 25 DAF | 30 DAF | 35 DAF  | 15 DAF                                       | 20 DAF | 25 DAF | 30 DAF | 35 DAF  | 15 DAF                            | 20 DAF | 25 DAF | 30 DAF | 35 DAF  |
| a) Well-watered   |                 |        |        |        |         |                                              |        |        |        |         |                                   |        |        |        |         |
| Doongara          | 2.3             | 3.5    | 3.8    | 1.8    | 0.7     | 66.9                                         | 67.3   | 51.6   | 23.5   | 8.5     | 27.6                              | 42.5   | 45.9   | 22.5   | 8.5     |
| Koshihikari       | 2.2             | 3.3    | 2.5    | 2.7    | 1.0     | 71.3                                         | 72.7   | 47.4   | 32.2   | 10.9    | 24.5                              | 36.1   | 27.7   | 30.6   | 10.9    |
| Langi             | 2.4             | 3.6    | 4.6    | 3.7    | 2.3     | 63.4                                         | 72.2   | 64.2   | 49.0   | 25.3    | 28.0                              | 41.2   | 53.8   | 42.8   | 25.3    |
| Reiziq            | 2.3             | 3.4    | 2.9    | 1.5    | 0.4     | 67.8                                         | 69.9   | 54.9   | 23.6   | 4.3     | 28.5                              | 43.0   | 35.0   | 18.4   | 4.3     |
| Sherpa            | 2.3             | 4.0    | 3.6    | 2.4    | 0.6     | 60.3                                         | 68.1   | 49.8   | 29.9   | 6.0     | 21.8                              | 37.3   | 33.5   | 22.0   | 6.0     |
| Tachiminori       | 2.7             | 3.9    | 2.7    | 1.5    | 1.1     | 63.4                                         | 73.0   | 45.9   | 22.1   | 14.9    | 36.3                              | 53.1   | 35.6   | 20.4   | 14.9    |
| TDK8              | 1.9             | 3.0    | 2.9    | 2.0    | 1.1     | 58.9                                         | 57.7   | 52.5   | 35.4   | 18.4    | 32.9                              | 51.6   | 48.9   | 35.1   | 18.4    |
| YRW4              | 2.3             | 3.2    | 4.3    | 2.5    | 0.4     | 70.0                                         | 74.4   | 67.2   | 38.7   | 5.3     | 30.0                              | 41.9   | 55.6   | 32.8   | 5.3     |
| Mean              | 2.3             | 3.5    | 3.4    | 2.3    | 1.0     | 65.3                                         | 69.4   | 54.2   | 31.8   | 11.7    | 28.7                              | 43.3   | 42.0   | 28.1   | 11.7    |
| LSD5% (Var)       |                 |        |        |        | 0.54*** |                                              |        |        |        | 5.08*** |                                   |        |        |        | 6.48*** |
| LSD5% (DAF)       |                 |        |        |        | 0.43*** |                                              |        |        |        | 4.02*** |                                   |        |        |        | 5.20*** |
| LSD5% (Var x DAF) |                 |        |        |        | 1.22ns  |                                              |        |        |        | 11.36** |                                   |        |        |        | 14.48ns |
| b) Water-deficit  |                 |        |        |        |         |                                              |        |        |        |         |                                   |        |        |        |         |
| Doongara          | 1.6             | 2.2    | 1.8    | 0.6    | 0.5     | 65.1                                         | 50.2   | 29.7   | 8.7    | 6.5     | 22.4                              | 30.1   | 25.8   | 7.5    | 6.5     |
| Sherpa            | 2.1             | 4.0    | 3.6    | 2.3    | 1.5     | 67.1                                         | 70.5   | 57.6   | 32.2   | 16.5    | 23.9                              | 45.2   | 41.3   | 26.1   | 16.5    |
| Tachiminori       | 1.7             | 3.4    | 2.9    | 1.5    | 1.0     | 60.5                                         | 69.4   | 55.0   | 25.0   | 14.5    | 24.2                              | 47.1   | 39.7   | 21.3   | 14.5    |
| TDK8              | 1.2             | 1.1    | 0.8    | 0.4    | 0.1     | 61.9                                         | 47.5   | 36.9   | 15.2   | 3.9     | 47.8                              | 42.1   | 33.4   | 14.6   | 3.9     |
| Mean              | 1.7             | 2.7    | 2.3    | 1.2    | 0.8     | 63.6                                         | 59.4   | 44.8   | 20.3   | 10.3    | 29.6                              | 41.1   | 35.1   | 17.4   | 10.3    |
| LSD5% (Var)       |                 |        |        |        | 0.34*** |                                              |        |        |        | 5.17*** |                                   |        |        |        | 5.80*** |
| LSD5% (DAF)       |                 |        |        |        | 0.38*** |                                              |        |        |        | 5.78*** |                                   |        |        |        | 6.48*** |
| LSD5% (Var x DAF) |                 |        |        |        | 0.75**  |                                              |        |        |        | 11.57*  |                                   |        |        |        | 12.96** |

\* Significant difference at P = 0.05; \*\* Significant difference at P = 0.01; \*\*\* Significant difference at P < 0.001; ns = No significant difference at P = 0.05

**Table S5.** Yield of paddy harvested at different days after flowering (DAF) and percentage of yield in mature paddy (Year 1)

| Variety           | Paddy Yield (t/ha) |        |        |        |         | Percentage in Mature Paddy (%) |        |        |        |         |
|-------------------|--------------------|--------|--------|--------|---------|--------------------------------|--------|--------|--------|---------|
|                   | 15 DAF             | 20 DAF | 25 DAF | 30 DAF | 35 DAF  | 15 DAF                         | 20 DAF | 25 DAF | 30 DAF | 35 DAF  |
| a) Well-watered   |                    |        |        |        |         |                                |        |        |        |         |
| Doongara          | 3.4                | 5.2    | 7.4    | 7.9    | 8.3     | 41.0                           | 63.1   | 89.6   | 95.7   | 100     |
| Koshihikari       | 3.1                | 4.6    | 5.3    | 8.5    | 9.2     | 34.4                           | 49.7   | 57.8   | 93.0   | 100     |
| Langi             | 3.8                | 5.0    | 7.2    | 7.6    | 8.8     | 43.2                           | 57.0   | 83.1   | 86.8   | 100     |
| Reiziq            | 3.3                | 5.0    | 5.1    | 6.2    | 8.3     | 42.0                           | 61.7   | 64.3   | 77.4   | 100     |
| Sherpa            | 3.8                | 5.7    | 7.3    | 8.1    | 10.6    | 36.0                           | 53.9   | 68.4   | 76.8   | 100     |
| Tachiminori       | 4.2                | 5.3    | 5.8    | 7.2    | 9.1     | 46.2                           | 59.0   | 63.8   | 79.5   | 100     |
| TDK8              | 3.2                | 5.2    | 5.4    | 5.7    | 5.9     | 56.1                           | 89.5   | 93.1   | 98.0   | 100     |
| YRW4              | 3.3                | 4.3    | 6.3    | 6.5    | 7.7     | 42.4                           | 56.4   | 82.2   | 84.4   | 100     |
| Mean              | 3.5                | 5.0    | 6.2    | 7.2    | 8.5     | 42.7                           | 61.3   | 75.3   | 86.4   | 100     |
| LSD5% (Var)       |                    |        |        |        | 0.72*** |                                |        |        |        | 8.45*** |
| LSD5% (DAF)       |                    |        |        |        | 0.57*** |                                |        |        |        | 6.68*** |
| LSD5% (Var x DAF) |                    |        |        |        | 1.62ns  |                                |        |        |        | 18.90ns |
| b) Water-deficit  |                    |        |        |        |         |                                |        |        |        |         |
| Doongara          | 2.4                | 4.3    | 5.1    | 5.6    | 6.4     | 37.3                           | 66.4   | 80.0   | 87.2   | 100     |
| Sherpa            | 3.1                | 5.6    | 6.3    | 7.2    | 8.9     | 35.6                           | 62.7   | 71.2   | 81.4   | 100     |
| Tachiminori       | 2.9                | 4.9    | 5.2    | 5.9    | 6.9     | 42.3                           | 71.1   | 75.8   | 85.5   | 100     |
| TDK8              | 2.0                | 2.2    | 2.3    | 2.4    | 3.0     | 65.3                           | 74.3   | 76.9   | 78.5   | 100     |
| Mean              | 2.6                | 4.3    | 4.7    | 5.3    | 6.3     | 45.1                           | 68.6   | 76.0   | 83.2   | 100     |
| LSD5% (Var)       |                    |        |        |        | 0.44*** |                                |        |        |        | 6.77*   |
| LSD5% (DAF)       |                    |        |        |        | 0.50*** |                                |        |        |        | 7.57*** |
| LSD5% (Var x DAF) |                    |        |        |        | 0.99*** |                                |        |        |        | 15.13ns |

\* Significant difference at P = 0.05; \*\* Significant difference at P = 0.01; \*\*\* Significant difference at P < 0.001; ns = No significant difference at P = 0.05
